# Supplementary material for: A Metacommunity Framework for Enhancing the Effectiveness of Biological Monitoring Strategies
Source: PLOS journal article supplement (doi:10.1371/journal.pone.0043626), 2012-08-24

# STEP 1

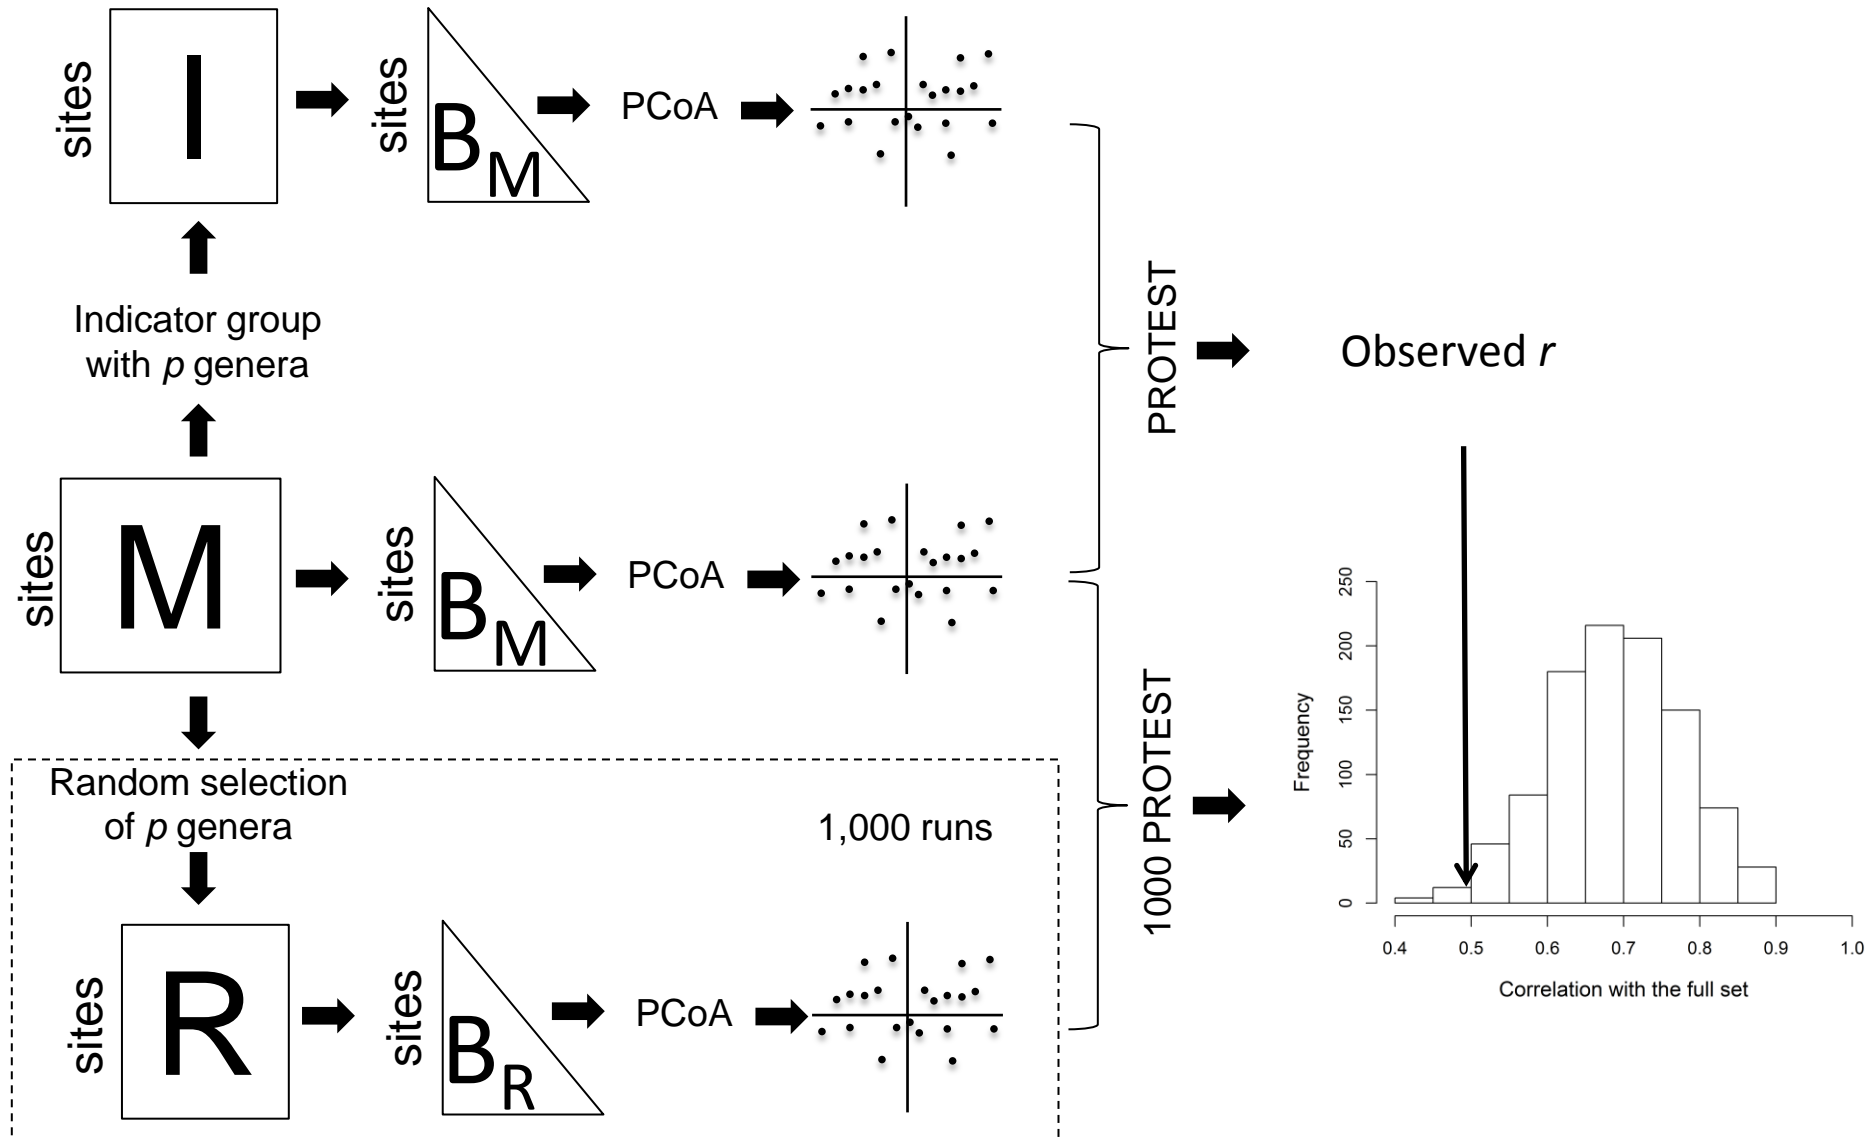

# STEP 2

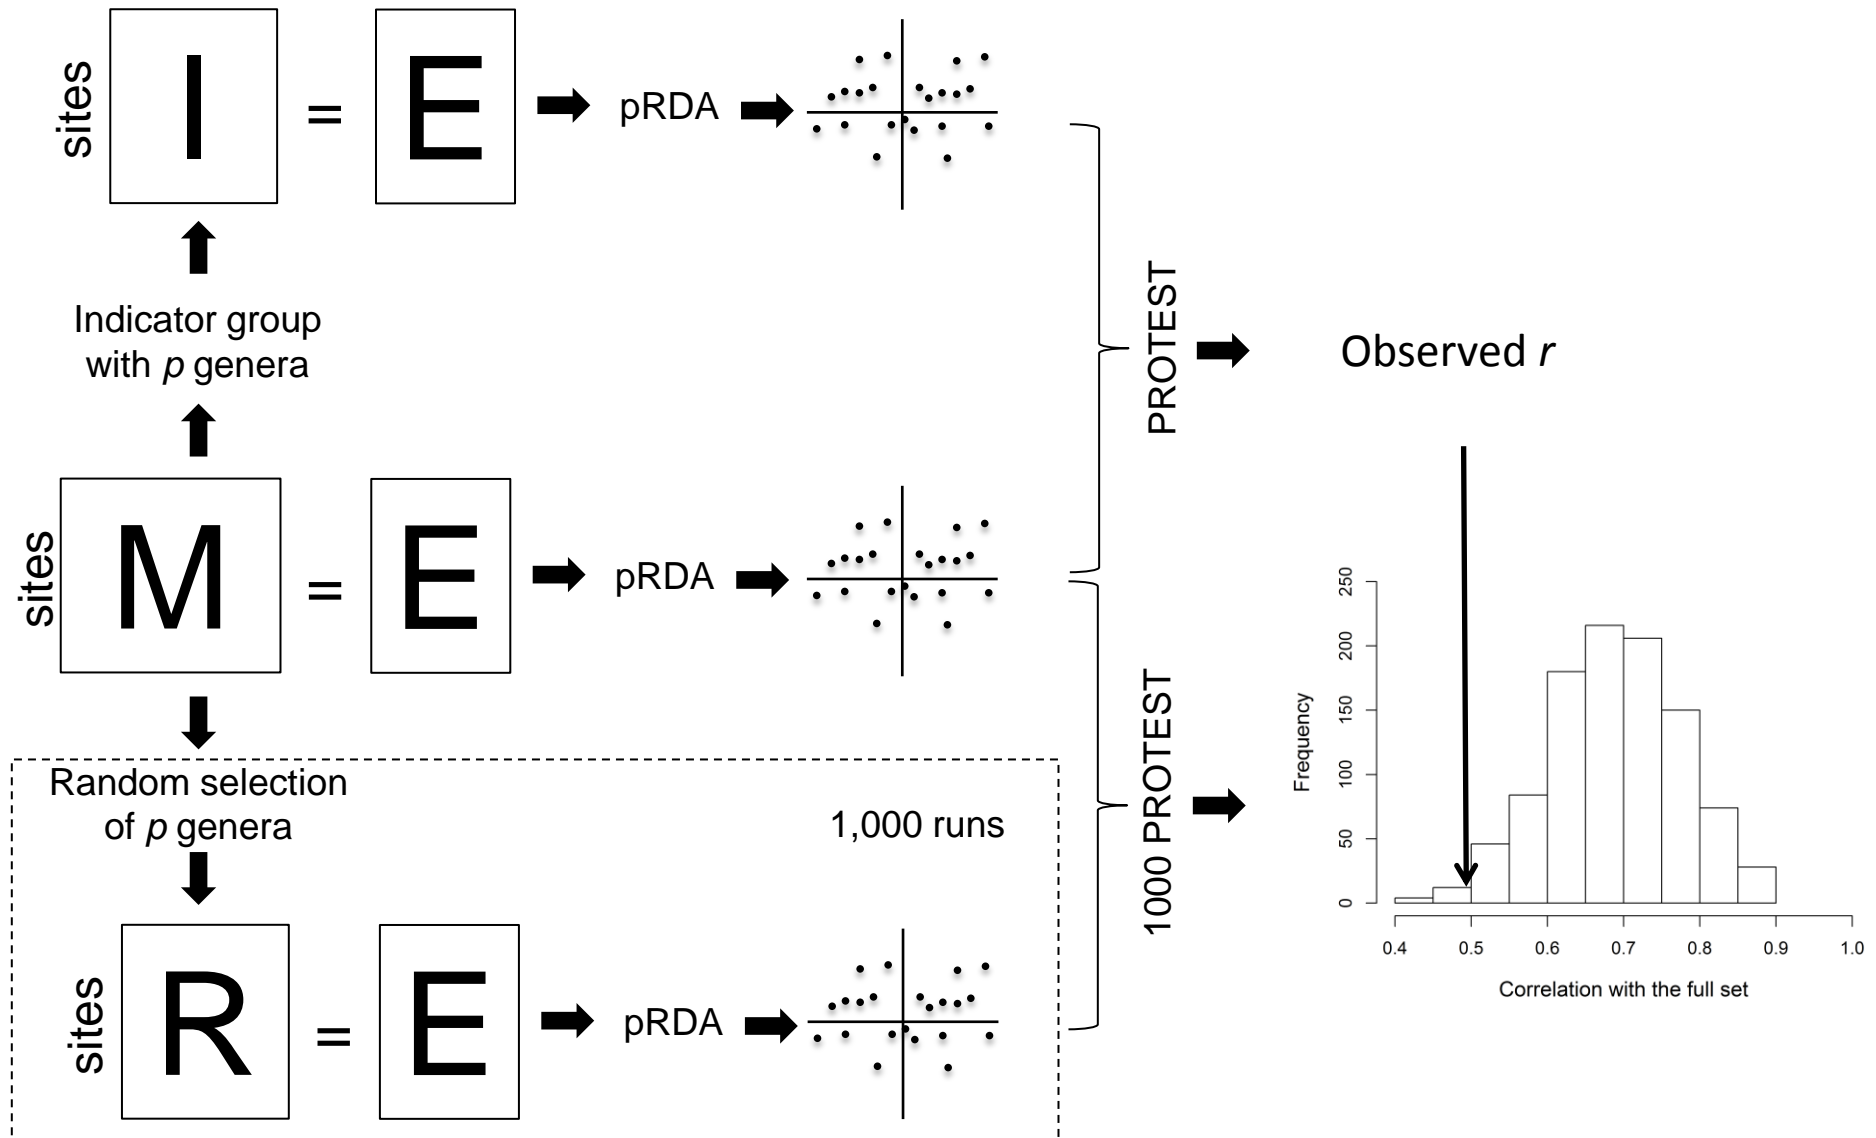

# STEP 3

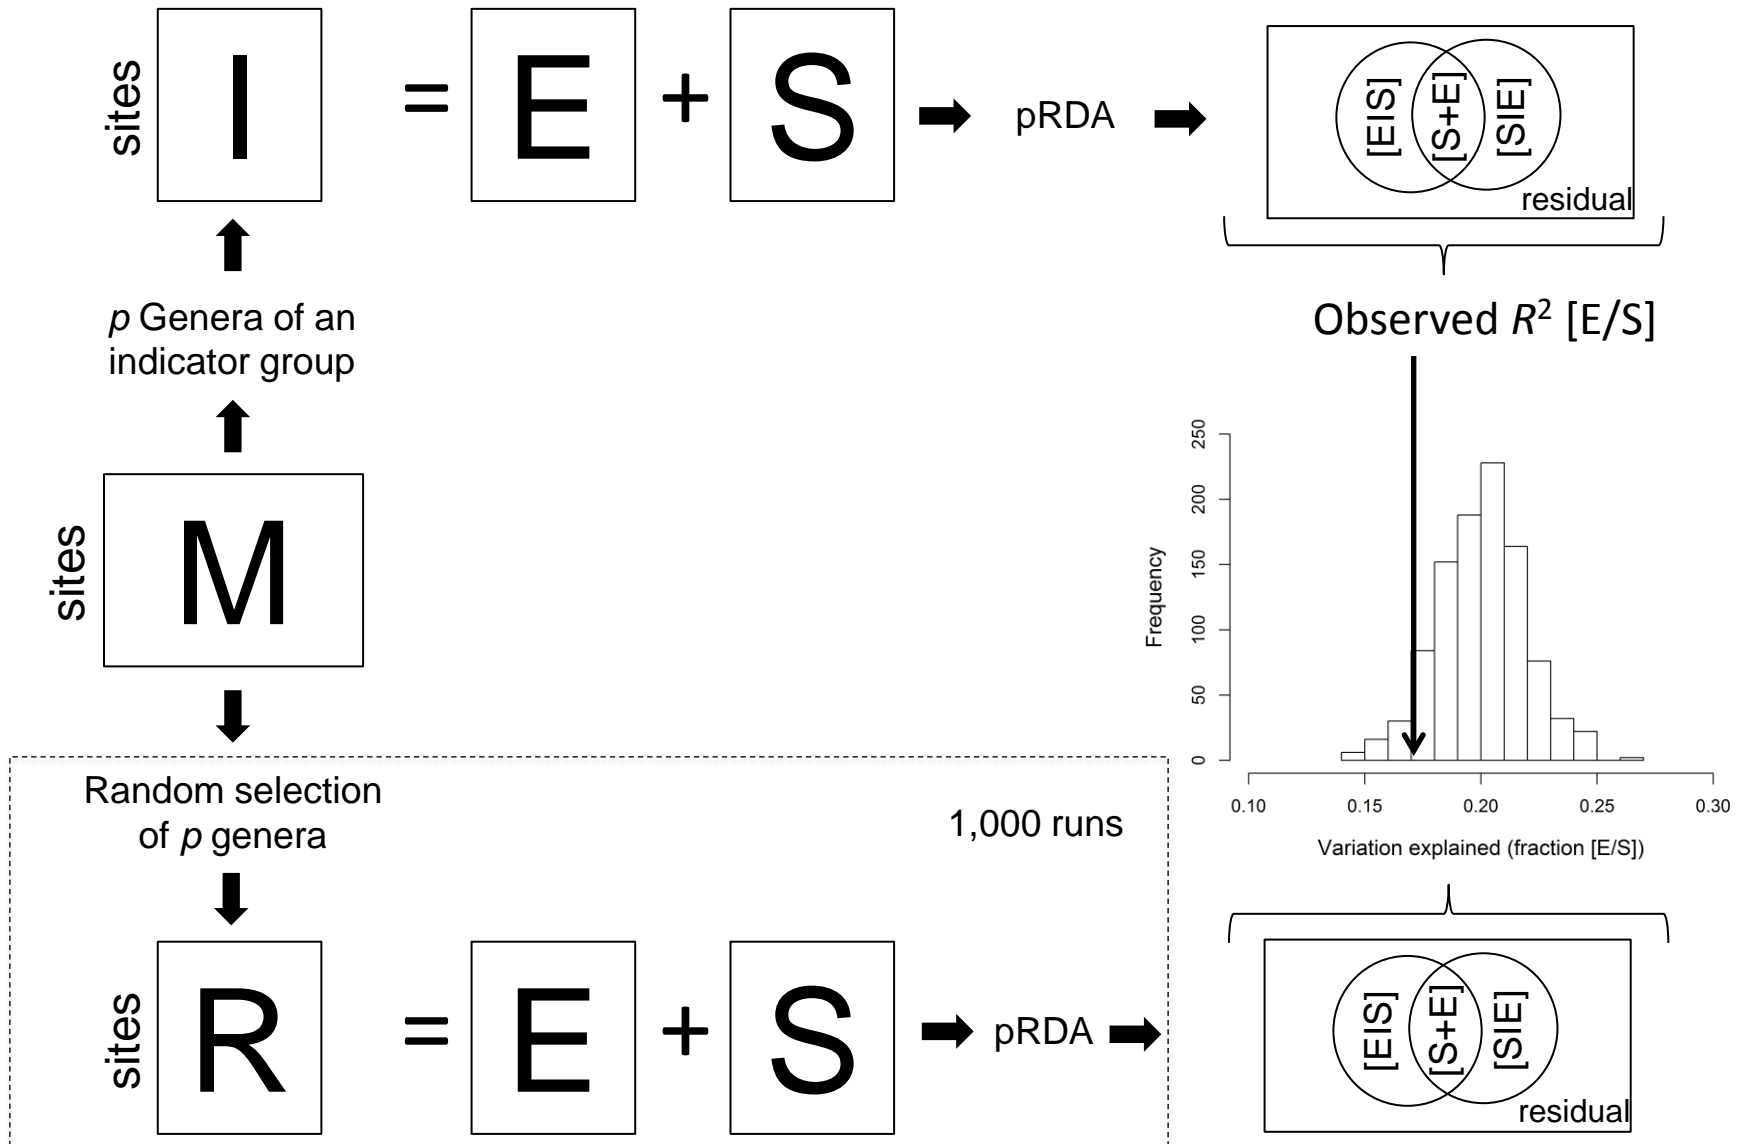

Supplement: S1 (10.1371/journal.pone.0043626.s001) [file journal.pone.0043626.s001]
